# Supplementary material for: Mixed gas adsorption of carbon dioxide and methane on a series of isoreticular microporous metal–organic frameworks based on 2-substituted imidazolate-4-amide-5-imidates
Source: Royal Society of Chemistry journal article supplement (doi:10.1039/c2jm15811f), 2012-01-01
Supplement: c2jm15811f.pdf [file c2jm15811f.pdf]

# Supporting Information

Indicating spreading pressure diagrams

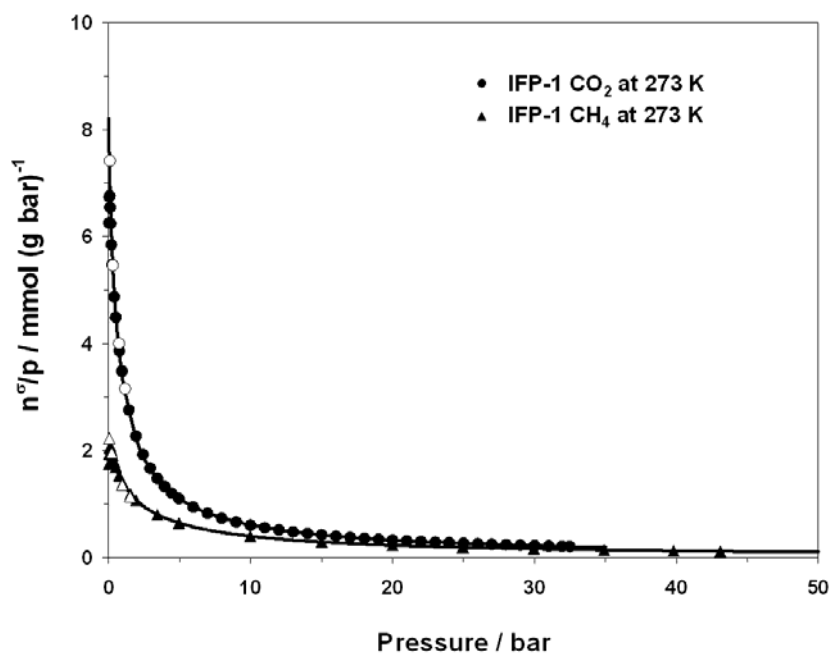

**Fig. 1** Integrant for spreading pressure of pure component adsorption (filled symbols from gravimetry, open symbols from volumetry, lines are Tòth model) for **IFP-1**.

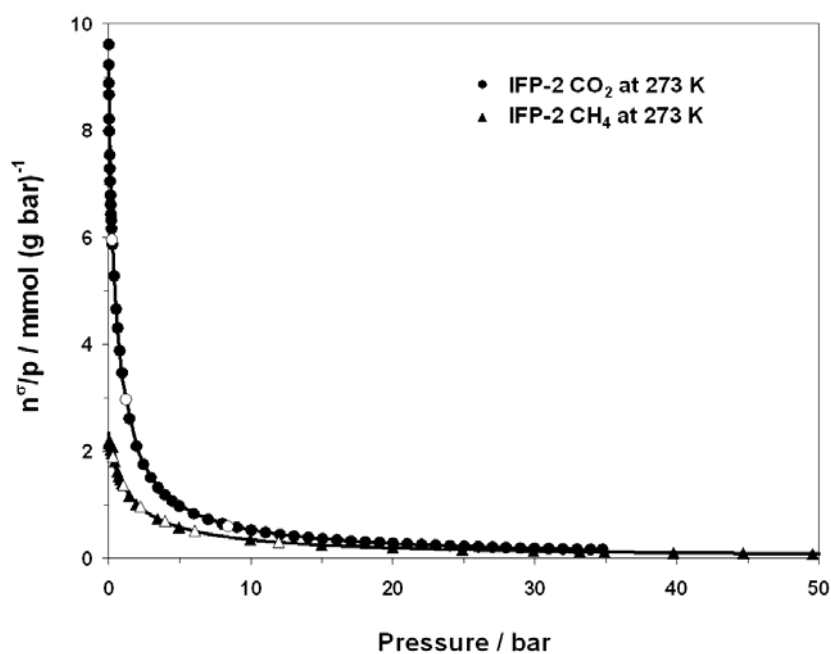

**Fig. 2** Integrant for spreading pressure of pure component adsorption (filled symbols from gravimetry, open symbols from volumetry, lines are Tòth model) for **IFP-2**.

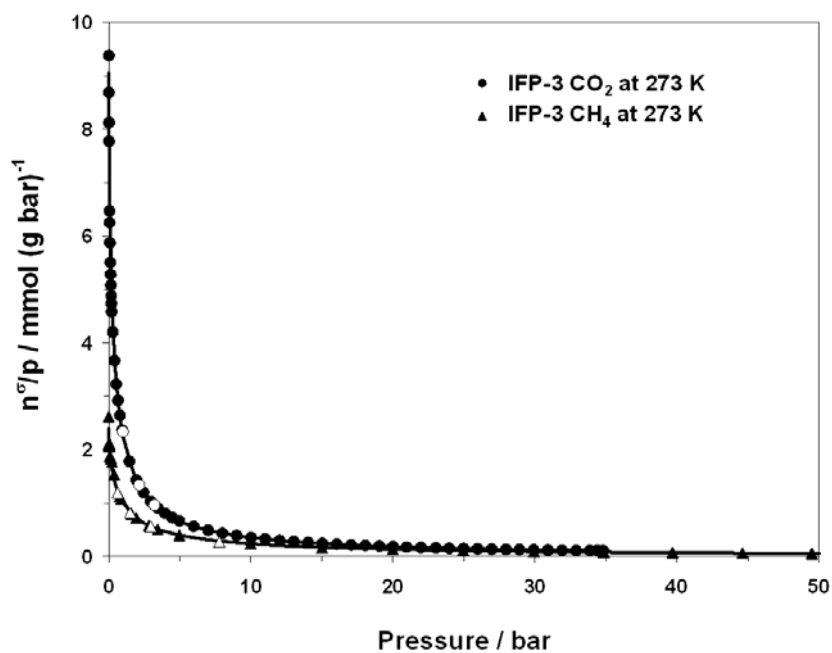

**Fig 3** Integrant for spreading pressure of pure component adsorption (filled symbols from gravimetry, open symbols from volumetry, lines are Tòth model) for **IFP-3**.

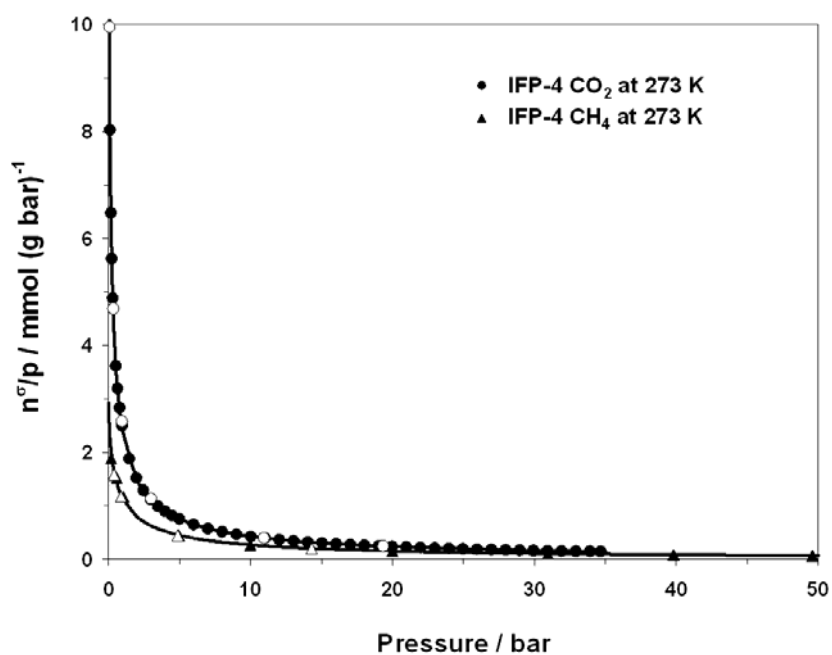

**Fig 4** Integrant for spreading pressure of pure component adsorption (filled symbols from gravimetry, open symbols from volumetry, lines are Tòth model) for **IFP-4**.

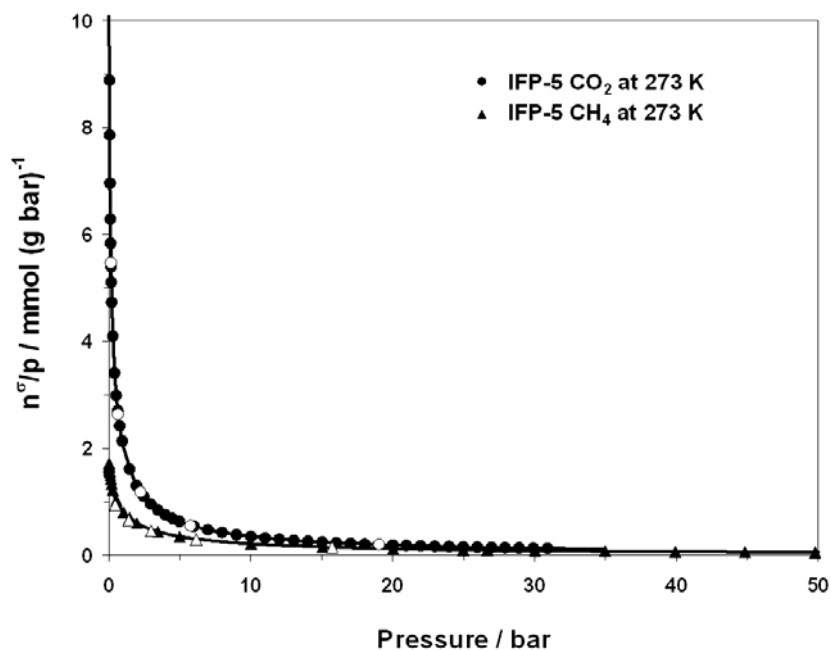

**Fig 5** Integrant for spreading pressure of pure component adsorption (filled symbols from gravimetry, open symbols from volumetry, lines are Tòth model) for **IFP-5**.

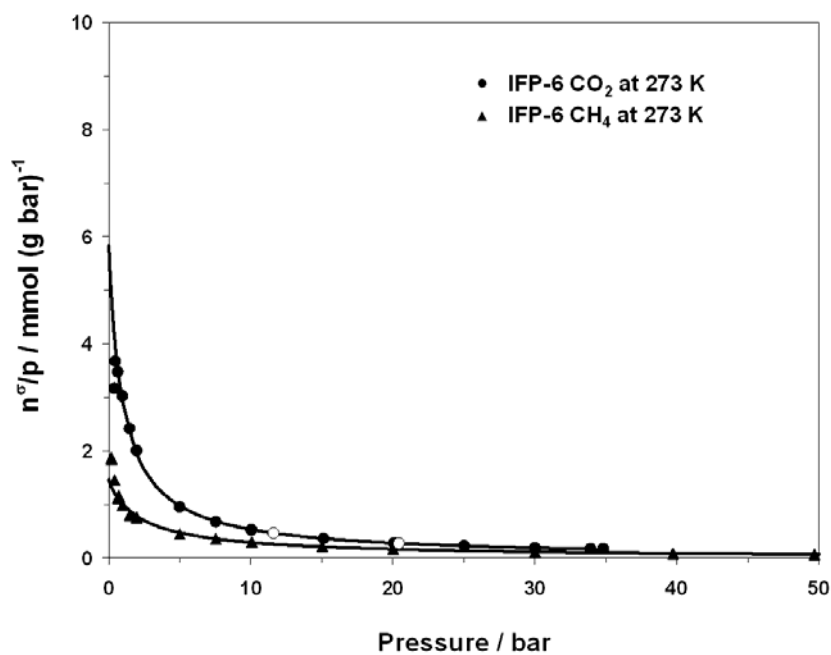

**Fig 6** Integrant for spreading pressure of pure component adsorption (filled symbols from gravimetry, open symbols from volumetry, lines are Tòth model) for **IFP-6**.
